# Supplementary material
Source: PubMed Central journal article supplement (PMC6669887)
Supplement: NIHMS1043856-supplement-SI_file_1.pdf [file NIHMS1043856-supplement-SI_file_1.pdf]

## Supporting Information

# **Accelerating the Throughput of Affinity Mass Spectrometry-Based Ligand Screening at a G Protein-Coupled Receptor**

Yan Lu,<sup>‡abc</sup> Shanshan Qin,<sup>‡a</sup> Bingjie Zhang,<sup>a</sup> Antao Dai,<sup>d</sup> Xiaoqing Cai,<sup>d</sup> Mengna Ma,<sup>abc</sup> Dehua Yang,<sup>d</sup> Raymond C. Stevens<sup>ab</sup>, Kenneth A. Jacobson,<sup>e</sup> Ming-Wei Wang,<sup>\*cdf</sup> & Wenqing Shui<sup>\*ab</sup>

### Contents

Table S1. Affinity MS screening data for initial hits identified in different compound pools (see a separate Excel sheet)

Table S2. Binding affinity determined for benchmark ligands and detection of these ligands in different compound pools

Figure S1. SEC and SDS-PAGE analysis of A<sub>2A</sub>R and HCAR<sub>2</sub> proteins

Figure S2. SPR sensorgrams and binding curves for 8 co-validated unknown ligands

Figure S3. Validation of three unknown ligands by affinity MS binding assay and comparison of initial hits from the 4800-mix screen under different conditions

Figure S4. Total ion chromatograms of the 20K compound pool, and compounds eluted from the target or the control after iterative affinity selection

Figure S5. SDS-PAGE and Western blot of A<sub>2A</sub>R and HCAR<sub>2</sub>-expressing cell membranes

Figure S6. Three unknown ligands missed in 480-mix screens yet identified in screening of more complex compound pools

Figure S7. Schematic of the interactions between 3288 (a) and 3676 (b) and A<sub>2A</sub>R

Table S2. Binding affinity determined for benchmark ligands and detection of these ligands in different compound pools

| Cpd ID | Name                      | Bioactivity                  | Ki [a] (nM) | Kd [b] (nM) | 480-mix | 2400-mix | 4800-mix | 20K-mix-pro | 20K-mix-mem |
|--------|---------------------------|------------------------------|-------------|-------------|---------|----------|----------|-------------|-------------|
| 3230   | Vipadenant                | A <sub>2A</sub> R antagonist | 1.3         | N.A.        | √       | √        | √        | √           | √           |
| 500    | Adenosine                 | A <sub>2A</sub> R agonist    | 20-30       | N.A.        | √       | √        | √        | √           | √           |
| 649    | Mefloquine HCl            | A <sub>2A</sub> R antagonist | 61          | N.A.        | √       | √        | √        | √           |             |
| 810    | Sildenafil                | A <sub>2A</sub> R antagonist | 142-200     | N.A.        | √       | √        | √        | √           |             |
| 3034   | Regadenoson               | A <sub>2A</sub> R agonist    | 290-1120    | N.A.        | √       |          |          |             |             |
| 931    | Oxendazole                | A <sub>2A</sub> R antagonist | 844         | N.A.        | √       | √        | √        | √           |             |
| 1748   | Galangin trimethyl ether  | A <sub>2A</sub> R antagonist | 6450        | N.A.        | √       |          |          |             |             |
| 956    | Vardenafil HCl            | N.A.                         | N.A.        | 461         | √       | √        | √        | √           | √           |
| 2581   | Vardenafil HCl Trihydrate | N.A.                         | N.A.        | 461         | √       | √        | √        | √           | √           |
| 3976   | Defactinib                | N.A.                         | N.A.        | 1362        | √       | √        | √        | √           | √           |
| 3404   | PF 573228                 | N.A.                         | N.A.        | 4111        | √       |          |          | √           | √           |
| 3293   | PF 431396                 | N.A.                         | N.A.        | 4290        | √       |          |          | √           | √           |
| 1781   | Sinensetin                | N.A.                         | N.A.        | 7320        | √       |          |          |             |             |
| 3288   | BMS-833923                | N.A.                         | N.A.        | 7693        | √       | √        | √        | √           |             |
| 3951   | LH-846                    | N.A.                         | N.A.        | 11410       | √       |          |          |             |             |
| 3588   | NG-52                     | N.A.                         | N.A.        | 24410       | √       |          |          |             |             |

[a]Data from ChEMBL database and references 23-26 cited in the manuscript. [b]Data from our SPR analysis of each ligand (see Fig. S2).

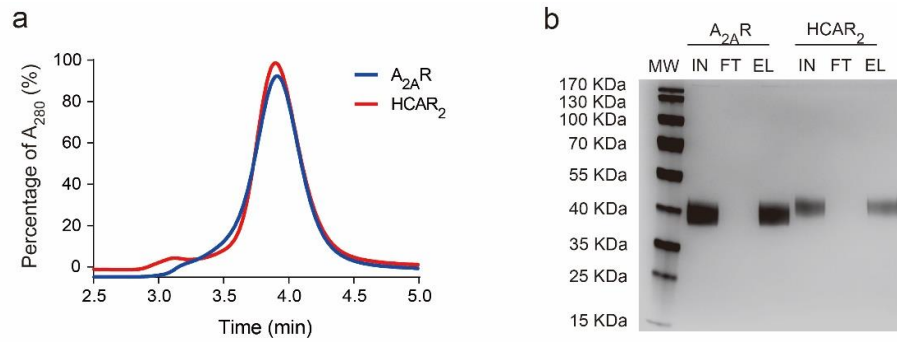

**Fig. S1** (a) aSEC profiles of purified  $A_{2A}R$  and  $HCAR_2$  show homogeneous protein conformations. (b) The SDS-PAGE image of proteins immobilized on the Nickel agarose beads. Aliquots of input (IN), unbound flow through (FT), and elute (EL) materials were stained with silver staining to reveal very efficient protein capture on the microbeads.

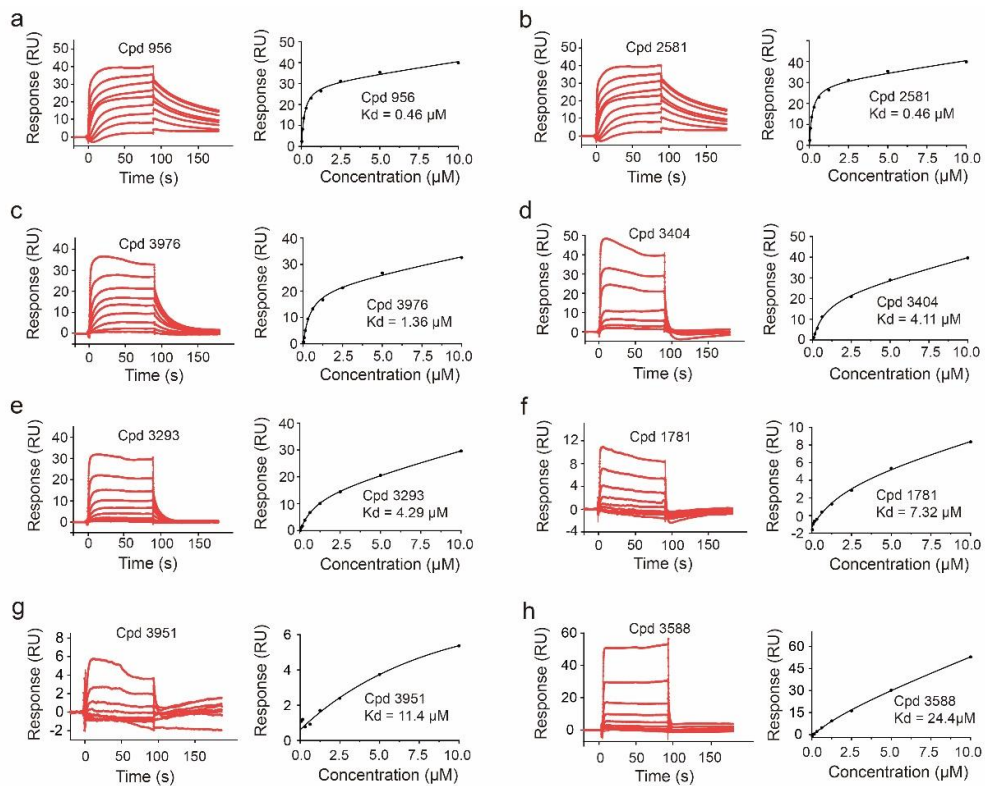

**Fig. S2** SPR sensorgrams (left) and binding curves (right) for co-validated unknown ligands. Compounds (a to h) were monitored in a titration experiment with 2-fold dilution series starting from 10  $\mu\text{M}$  to 0.04  $\mu\text{M}$ . Dose-response plots were fitted to one-to-one interaction model. Data are shown as means of duplicate measurements at each concentration.

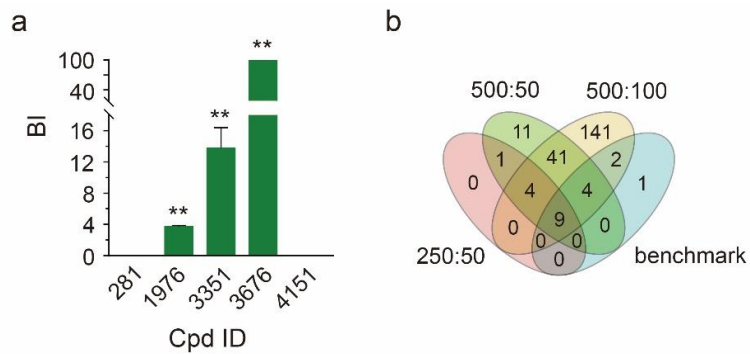

**Fig. S3** (a) Hit validation with the affinity MS assay on a mixture of 5 unknown ligands identified from the 2400-mix and 4800-mix screens. Confirmed ligands (mean BI >2 and P <0.01) are designated by asterisks, with data shown as mean plus S.D. of four individual assays. (b) Overlap of initial hits identified from screening the 4800-mix pool at different protein:compound incubation ratios and comparison with the benchmark ligand set. The incubation condition is protein:ligand = 250 nM:50 nM (red), 500 nM:50 nM (green) or 500 nM:100 nM (yellow).

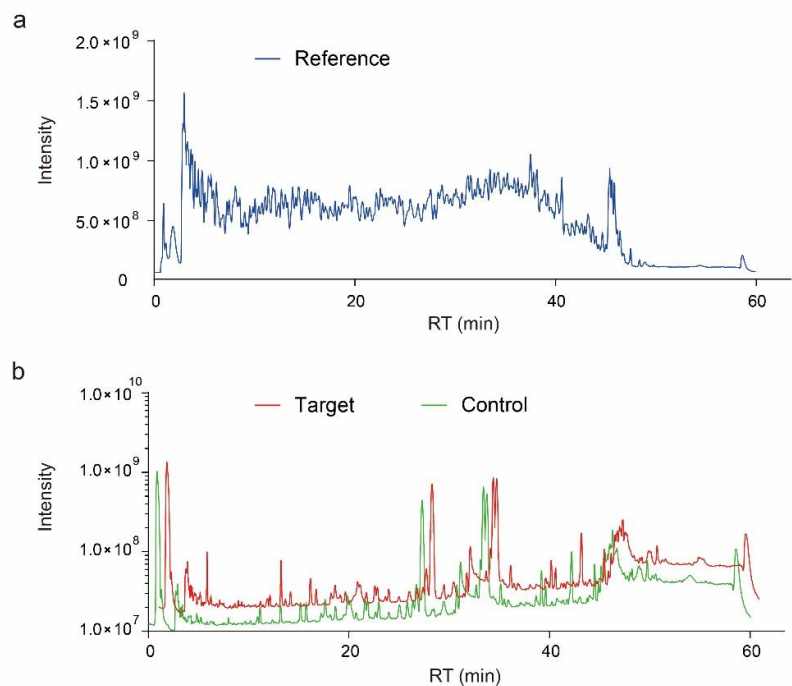

**Fig. S4** Total ion chromatograms of the 20K compound pool (a) and compounds eluted from the target or the control after iterative affinity selection with purified receptors (b).

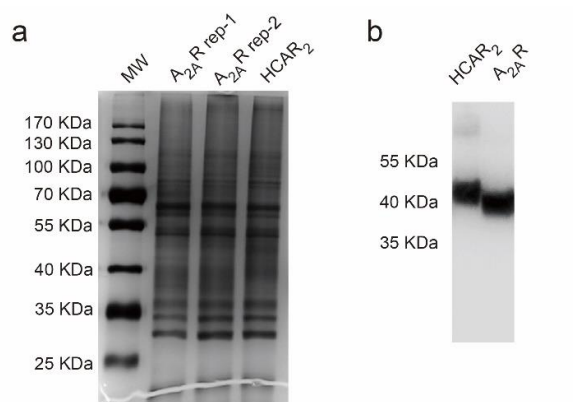

**Fig. S5** SDS-PAGE and Western blot of A<sub>2A</sub>R and HCAR<sub>2</sub>-expressing cell membranes. (a) SDS-PAGE image of all proteins extracted from cell membranes expressing A<sub>2A</sub>R or HCAR<sub>2</sub>. (b) Western blot of A<sub>2A</sub>R or HCAR<sub>2</sub> in the receptor-expressing cell membranes detected by an anti-Flag antibody.

|                 | Cpd ID | 480-mix | 2400-mix | 4800-mix | 20K-mix-pro | 20K-mix-mem |
|-----------------|--------|---------|----------|----------|-------------|-------------|
| Unknown ligands | 1976   |         | ●        | ●        | ●           | ●           |
|                 | 3351   |         | ●        | ●        | ●           |             |
|                 | 3676   |         | ●        | ●        | ●           | ●           |

**Fig. S6** Three unknown ligands missed in 480-mix screens yet identified in screening of more complex compound pools.

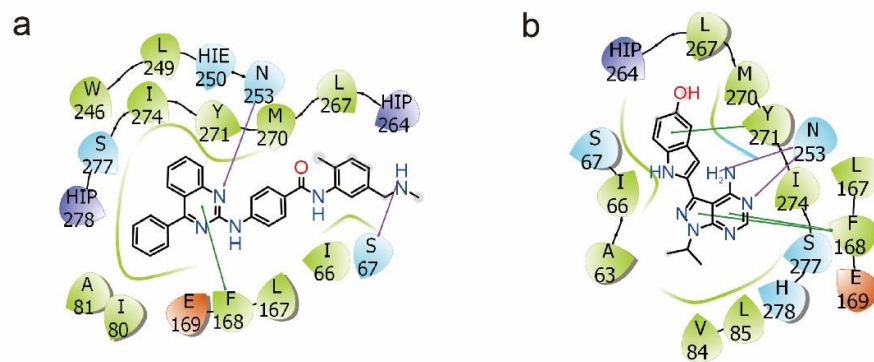

**Fig. S7** Schematic of the interactions between 3288 (a) and 3676 (b) and A<sub>2A</sub>R. Residue colors: negatively charged, red; positively charged, purple; hydrophobic/aromatic, green; polar, cyan. Interactions: hydrogen bonds, magenta line;  $\pi$ - $\pi$  interaction, dark green line. HIE: hydrogens on one nitrogen of His; HIP: hydrogens on both nitrogens of His.
